# Supplementary material for: I realized what I was doing was not working: the influence of explicit teaching of metacognition on students’ study strategies in a general chemistry I course
Source: Royal Society of Chemistry journal article supplement (doi:10.1039/d0rp00217h), 2020-10-05
Supplement: d0rp00217h2.pdf [file d0rp00217h2.pdf]

## **Appendix B: End of Semester Metacognition Questionnaire**

1. Describe how the metacognition lesson helped you adjust your study strategies in this course.
