# Supplementary material for: I realized what I was doing was not working: the influence of explicit teaching of metacognition on students’ study strategies in a general chemistry I course
Source: Royal Society of Chemistry journal article supplement (doi:10.1039/d0rp00217h), 2020-10-05
Supplement: d0rp00217h3.pdf [file d0rp00217h3.pdf]

**Appendix C. Categories and major categories generated from reported study strategies before and after the metacognition instruction**

| <b>Generated Categories</b>            | <b>Major Categories</b>                  |
|----------------------------------------|------------------------------------------|
| Reading and Rereading                  | <b>Rote Memorization</b>                 |
| Flashcards and Quizlets                |                                          |
| Memorization/Cramming                  |                                          |
| Practicing Problems                    | <b>Higher-Order Study Strategies</b>     |
| Reflective Learning                    |                                          |
| Collaborative Learning                 |                                          |
| Self-Assessment                        |                                          |
| Poor Planning and Procrastination*     | <b>Poor Planning and Procrastination</b> |
| Time Management and Planning           | <b>Time Management and Planning</b>      |
| Studying with Notetaking               | <b>Studying with Notetaking</b>          |
| Educational Videos                     | <b>Utilizing Outside-Class Resources</b> |
| Supplemental Instruction (SI) Sessions |                                          |
| Professor/ TA Office Hours             |                                          |

\*There were no responses related to this category after the metacognition instruction.
