# Supplementary material for: I realized what I was doing was not working: the influence of explicit teaching of metacognition on students’ study strategies in a general chemistry I course
Source: Royal Society of Chemistry journal article supplement (doi:10.1039/d0rp00217h), 2020-10-05
Supplement: d0rp00217h4.pdf [file d0rp00217h4.pdf]

**Appendix D. General chemistry students' self-reported study strategies prior to the metacognition lesson and examples of participants' responses**

| Reported Strategies                                                                         | Examples of Participants' Responses                                                                                                                                                                                                                                                                                                                                                                                                                                                                                                                                                                                                                                                                                                                                                                                                                                                                                                                                                                                                                                                                                                                                                                                                                                                                                                                                                                                                                                                                                                                                                                                                                                                                                                                                                                                                                                                                                                                                                                                                                                                                                                                              |
|---------------------------------------------------------------------------------------------|------------------------------------------------------------------------------------------------------------------------------------------------------------------------------------------------------------------------------------------------------------------------------------------------------------------------------------------------------------------------------------------------------------------------------------------------------------------------------------------------------------------------------------------------------------------------------------------------------------------------------------------------------------------------------------------------------------------------------------------------------------------------------------------------------------------------------------------------------------------------------------------------------------------------------------------------------------------------------------------------------------------------------------------------------------------------------------------------------------------------------------------------------------------------------------------------------------------------------------------------------------------------------------------------------------------------------------------------------------------------------------------------------------------------------------------------------------------------------------------------------------------------------------------------------------------------------------------------------------------------------------------------------------------------------------------------------------------------------------------------------------------------------------------------------------------------------------------------------------------------------------------------------------------------------------------------------------------------------------------------------------------------------------------------------------------------------------------------------------------------------------------------------------------|
| <p>Reading and Re-reading, Memorization, Flashcards, and Quizlets</p> <p>(N=236, 37.3%)</p> | <p><b><u>Reading and re-reading:</u></b></p> <ul style="list-style-type: none"> <li>-I tend to go over and over the material until I get the right answer.</li> <li>-Currently, my study habits consist of rereading the text.</li> <li>-My main strategy is the repetition of information over and over again so that it is ingrained in my mind.</li> <li>-I usually just re-read material.</li> <li>-What I currently do is take notes and read the textbook...And when I study I really just study the notes over and over again.</li> <li>-I study by taking time out of my night to reread.</li> <li>-Rereading the covered materials starting the week before.</li> <li>-Most of the time I like to at least go over it five times, and even more than that if I am struggling with the information.</li> <li>-And reading them several times over eliminating concepts I feel I have a good grasp on.</li> </ul> <p><b><u>Memorization/Flashcards/quizlet/notecards:</u></b></p> <ul style="list-style-type: none"> <li>-Rehearsal and rote learning have enabled me to commit everything to my memory.</li> <li>-I will sit for a long time and cram the information in a quiet place like a coffee shop.</li> <li>-I tend to cram study typically because I hold information best when it's recent.</li> <li>-My current habits for studying involve making note cards and having the cards memorized.</li> <li>-Sometimes make flashcards to help me study and memorize terms and definitions.</li> <li>-I will cram right before an exam because I get overwhelmed.</li> <li>-My study habits consist of memorization techniques such as flashcards.</li> <li>-I tend to cram study typically because I hold information best when it's recent...I always begin to study with rewriting because I remember information best when I've written it multiple times.</li> <li>-I also try to memorize problems before tests.</li> <li>-For one I try to cram all my subjects that I am studying into one study session and sometimes I get really confused.</li> <li>-I will also look for quizlet files that relate to what we are studying.</li> </ul> |
| <p>Poor Planning</p> <p>(N=68, 10.7%)</p>                                                   | <ul style="list-style-type: none"> <li>-When it comes to studying for a test I like to study the night before.</li> <li>-My current study strategy is to start studying four or five days before an exam.</li> <li>-I have a tendency, however, to procrastinate in my studies and wait until the last minute either the day before or a couple of days prior to the exams.</li> <li>-Most of my professors would give us the test dates at the beginning of the year and I would wait until the last 2 days to study and ended up cramming.</li> <li>-I don't start studying until the week before so I always feel like I am cramming at the last minute in order to remember all of the material.</li> </ul>                                                                                                                                                                                                                                                                                                                                                                                                                                                                                                                                                                                                                                                                                                                                                                                                                                                                                                                                                                                                                                                                                                                                                                                                                                                                                                                                                                                                                                                  |

Appendix D (Continued)

| Reported Strategies                                                                                         | Examples of Participants' Responses                                                                                                                                                                                                                                                                                                                                                                                                                                                                                                                                                                                                                                                                                                                                                                                                                                                                                                                                                                                                                                                                                                                                                                                                                                                                                                                                                                                                                                                                                                                                                                                                                                                                                                  |
|-------------------------------------------------------------------------------------------------------------|--------------------------------------------------------------------------------------------------------------------------------------------------------------------------------------------------------------------------------------------------------------------------------------------------------------------------------------------------------------------------------------------------------------------------------------------------------------------------------------------------------------------------------------------------------------------------------------------------------------------------------------------------------------------------------------------------------------------------------------------------------------------------------------------------------------------------------------------------------------------------------------------------------------------------------------------------------------------------------------------------------------------------------------------------------------------------------------------------------------------------------------------------------------------------------------------------------------------------------------------------------------------------------------------------------------------------------------------------------------------------------------------------------------------------------------------------------------------------------------------------------------------------------------------------------------------------------------------------------------------------------------------------------------------------------------------------------------------------------------|
| <p>Good Time, Management, Planning (N=65, 10.3%)</p>                                                        | <p>-My most used study strategy is to begin with the topics I am least confident about. I like to spend most of my studying time focused on my weaker topics. I try my best to hone in on why I don't understand the topic and how I can get to an understanding of it. After I repeat these actions for all of the topics or skills I am concerned about I move on to a type of overview. I go back and review the entire section I am about to be tested on to brush up on topics and to make sure I didn't forget about any concepts.</p> <p>-I divide my time studying for class by what classes I went to that day.</p> <p>-I do any homework the day that it is assigned, if applicable. If possible, I try to do my assigned homework right after its respective class.</p> <p>-Plan homework, quizzes, and exams out so that I make enough time to fully prepare for each one in different classes.</p> <p>-I usually try to do my homework throughout the week rather than the day it is due if I am not too busy.</p> <p>-Sometimes I like to set study goals for the week and myself, usually setting a number of chapters or content for each day.</p> <p>-Currently, I set aside several hours each day for any subjects that I might need to study.</p> <p>-I usually start studying for a test two weeks out to ensure I have enough time to reread and do quizzes.</p> <p>-My current study habits are to read the chapters needed prior to class.</p> <p>-I schedule specific times to study certain classes for four days of the week.</p> <p>-Currently, I do block studying. I will allocate a lot of time and the location to study a specific course, and develop a plan on what material I need to cover.</p> |
| <p>Studying with Notetaking (N=56, 8.8%)</p>                                                                | <p>-Currently, I study by taking notes.</p> <p>-When I take my notes, I make sure that I abbreviate the main important topics that I will need to know for the tests. I also try to highlight and color code my notes to make them easier for me to understand.</p> <p>-Taking notes during or just after reading the textbook.</p> <p>-Color coding my notes makes studying more fun and interesting for me so I tend to retain information.</p>                                                                                                                                                                                                                                                                                                                                                                                                                                                                                                                                                                                                                                                                                                                                                                                                                                                                                                                                                                                                                                                                                                                                                                                                                                                                                    |
| <p>Outside-Class Resources- Educational Videos, SI Sessions, and TA/Professor Office Hours (N=51, 8.1%)</p> | <p><b><u>Internet</u></b></p> <p>-When studying/learning new material I find it beneficial to seek out further instruction on the topic from outside sources, such as [online educational] videos.</p> <p>-Watching informational/supplementary [educational] videos.</p> <p>-I use the internet and [educational] videos.</p> <p>-I try to incorporate [online educational] videos during my studying because I am a visual learner.</p> <p>-I use a program called Clutch Prep to go over the topic/section for the day.</p>                                                                                                                                                                                                                                                                                                                                                                                                                                                                                                                                                                                                                                                                                                                                                                                                                                                                                                                                                                                                                                                                                                                                                                                                       |

Appendix D (Continued)

| Reported Strategies                                                                                  | Examples of Participants' Responses                                                                                                                                                                                                                                                                                                                                                                                                                                                                                                                                                                                                                                                                                                      |
|------------------------------------------------------------------------------------------------------|------------------------------------------------------------------------------------------------------------------------------------------------------------------------------------------------------------------------------------------------------------------------------------------------------------------------------------------------------------------------------------------------------------------------------------------------------------------------------------------------------------------------------------------------------------------------------------------------------------------------------------------------------------------------------------------------------------------------------------------|
| Outside-Class Resources- Educational Videos, SI Sessions, and TA/Professor Office Hours (N=51, 8.1%) | <p><u><i>SI sessions/TA/Professor office hours</i></u></p> <ul style="list-style-type: none"> <li>-If at that point, I still am not understanding what was being said, I will seek help directly from the professor.</li> <li>-By attending supplemental instruction, I not only feel that I gain a greater understanding...Additionally, I enjoy taking advantage of the LASSO center in order to have one on one tutoring which I feel helps me key in on the gaps in my memory and form a better educational foundation.</li> <li>-To study I tend to get with a tutor and go over the material that I am testing over.</li> <li>- If I do not understand a concept, I go to the TA and ask before going to the professor.</li> </ul> |
| Practice Problems (N=49, 6.8%)                                                                       | <ul style="list-style-type: none"> <li>-I do as many practice problems as possible.</li> <li>-Work out practice questions (from reviews or back of the book).</li> <li>-If I need to know how to do something, I usually do many practice problems.</li> <li>-I practice problems while going through the material to make sure I completely understand the concepts.</li> <li>-Normally I do practice problems in order to better understand the process (depending on what we are doing), and I go online and do practice problems not assigned.</li> </ul>                                                                                                                                                                            |
| Reflective Learning (N=43, 6.8%)                                                                     | <ul style="list-style-type: none"> <li>-Then go back and reflect on the notes later while I am studying and I remind myself of the topics and.</li> <li>-Once I have learned something new I like to revisit the idea in my head several times a day and connect the idea with other concepts from the class.</li> <li>-Reflect upon key points from daily lectures and review areas in which I struggle or have misunderstandings.</li> <li>-I will ask myself how I've been working on a problem and why I got the answer until I have a complete understanding of the subject.</li> <li>-Draw diagrams and pictures of processes and phenomena. Describe what is happening step by step next to the picture that shows it.</li> </ul> |
| Collaborative Learning (N=38, 6%)                                                                    | <ul style="list-style-type: none"> <li>-Studying with friends is very beneficial because you get the opportunity to learn from each other.</li> <li>-I also like to meet up with peers to discuss any topics I am struggling with.</li> <li>-My current study strategies are to work with my friend who is taking the same course to study. I also plan to ask friends who have already taken the course for tips on study habits and strategies.</li> <li>-I tend to do the best on a test when I study with a friend group or study group.</li> <li>-I sometimes make study groups with my fellow peers.</li> </ul>                                                                                                                    |
| Self-assessment (N=27, 4.3%)                                                                         | <ul style="list-style-type: none"> <li>-I constantly quiz myself throughout my studying process to see if I am fully retaining the information. If I do know the information then I will mark it so I know that I understand the concepts so I don't have to focus on that topic.</li> <li>-I practice testing myself before taking exams and try to go over all of the material multiple times.</li> <li>-Then quizzing myself over the material. If I get any questions wrong on my self-quiz, I then analyze the material I am not as familiar with and quiz myself again.</li> </ul>                                                                                                                                                 |
