# Supplementary material for: I realized what I was doing was not working: the influence of explicit teaching of metacognition on students’ study strategies in a general chemistry I course
Source: Royal Society of Chemistry journal article supplement (doi:10.1039/d0rp00217h), 2020-10-05
Supplement: d0rp00217h7.pdf [file d0rp00217h7.pdf]

### Appendix G. Participants' Self-Reported Gains in Metacognitive Regulation Skills and Representative Participants' Responses

| Metacognition Framework Dimensions                           | Reported Metacognitive Regulation Skills Gained                 | Representative Participants' Responses                                                                                                                                                                                                                                                                                                                                                                                                                                                                                                                                                                                                                                                                                                                                                                                                                                                                                                                                                                                                                                                                                                                                                                                                      |
|--------------------------------------------------------------|-----------------------------------------------------------------|---------------------------------------------------------------------------------------------------------------------------------------------------------------------------------------------------------------------------------------------------------------------------------------------------------------------------------------------------------------------------------------------------------------------------------------------------------------------------------------------------------------------------------------------------------------------------------------------------------------------------------------------------------------------------------------------------------------------------------------------------------------------------------------------------------------------------------------------------------------------------------------------------------------------------------------------------------------------------------------------------------------------------------------------------------------------------------------------------------------------------------------------------------------------------------------------------------------------------------------------|
| Metacognitive Regulation: Planning<br><br>(N = 36 Responses) | Planning, preparing, or setting goals for lessons (16.5%, N=21) | -It [The metacognition lesson] helped me organize my thoughts and ideas.<br>-[The metacognition lesson] helped me realize how much more I should be studying.<br>-It [The metacognition lesson] allowed me to more easily identify what I needed to work on and what I needed to not do.<br>-It [The metacognition lesson] helped me see what I need to do.<br>-[The metacognition lesson taught me] not cram for exams the night before.<br>-It [The metacognition lesson] helped me learn how to take notes and divide my time.<br>-The metacognition lesson helped me recognized a good way to figure out how to prepare for exams.<br>-It is a good idea to organize yourself and understand what works best.<br>-It [The metacognition lesson] helped me realize that I needed to spread out my studying.<br>-I learned I needed to study more days in a row before the test to exercise my brain memorization.<br>-[The] Metacognition [lesson] helped me learn how to properly study and manage my time.<br>-It [The metacognition lesson] just helped me pace myself instead of cramming.<br>-It [The metacognition lesson] helped me get ahead of studying.<br>-[The metacognition lesson] helped me study more than I would have. |
|                                                              | Improved thinking about learning (10.4%, N =12)                 | -It [The metacognition lesson] made me think more.<br>- I thought about what I was doing more.<br>-It [The metacognition lesson] made me think about the problem more critically and not cram for exams.<br>-It [The metacognition lesson] made me think more in-depth about my usual study habits and really decide how I want to be successful in this class.<br>-It [The metacognition lesson] encouraged me to think about things a little longer.<br>-It [The metacognition lesson] helped me with my study skills and how to solve problems using critical thinking.<br>-It [The metacognition lesson] taught me to try comprehending and reinforcing concepts rather than memorizing them.                                                                                                                                                                                                                                                                                                                                                                                                                                                                                                                                           |

Appendix G (Continued)

| <b>Metacognition Framework Dimensions</b> | <b>Reported Metacognitive Regulation Skills Gained</b> | <b>Representative Participants' Responses</b>                                                                                                                                                              |
|-------------------------------------------|--------------------------------------------------------|------------------------------------------------------------------------------------------------------------------------------------------------------------------------------------------------------------|
|                                           | Reinforced self-reflection on learning (1.7%, N =3)    | <ul style="list-style-type: none"> <li>- I learned how to reflect on my own timing.</li> <li>- It [The metacognition lesson] helped me reflect on what did and did not work in my study habits.</li> </ul> |
